# Supplementary material
Source: ML conference proceedings conference paper supplement (https://proceedings.neurips.cc/paper_files/paper/2019/hash/f490c742cd8318b8ee6dca10af2a163f-Abstract.html)
Supplement: Supplementary file [file f490c742cd8318b8ee6dca10af2a163f-Supplemental.zip]

---

# Appendix

---

## 1 Cross subject prediction

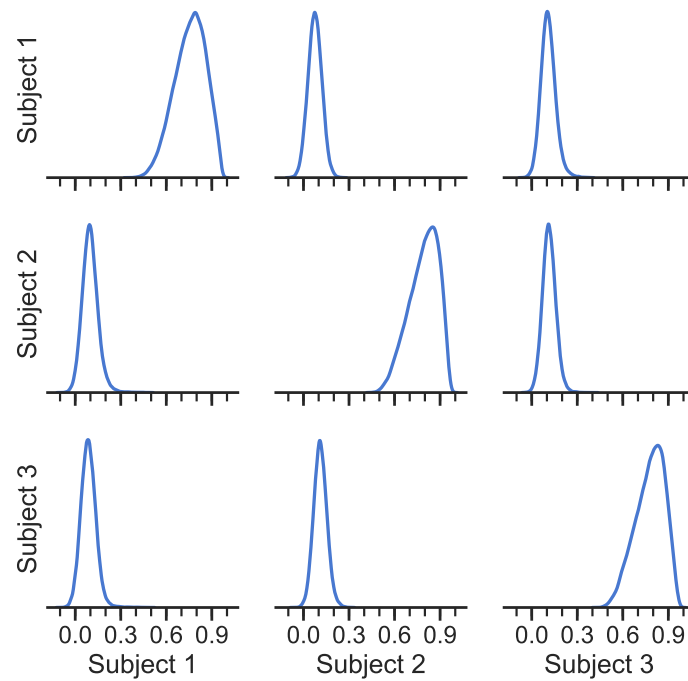

Figure 1: Noise ceiling derived from cross subject prediction. Each subfigure is a histogram of correlation scores across all voxels in a subjects. Y-axis indicates which subjects the prediction is from while x-axis indicates which the prediction is of.

## 2 Model predictions of tasks from Taskonomy

## 3 Task similarity tree using "ward" linkage

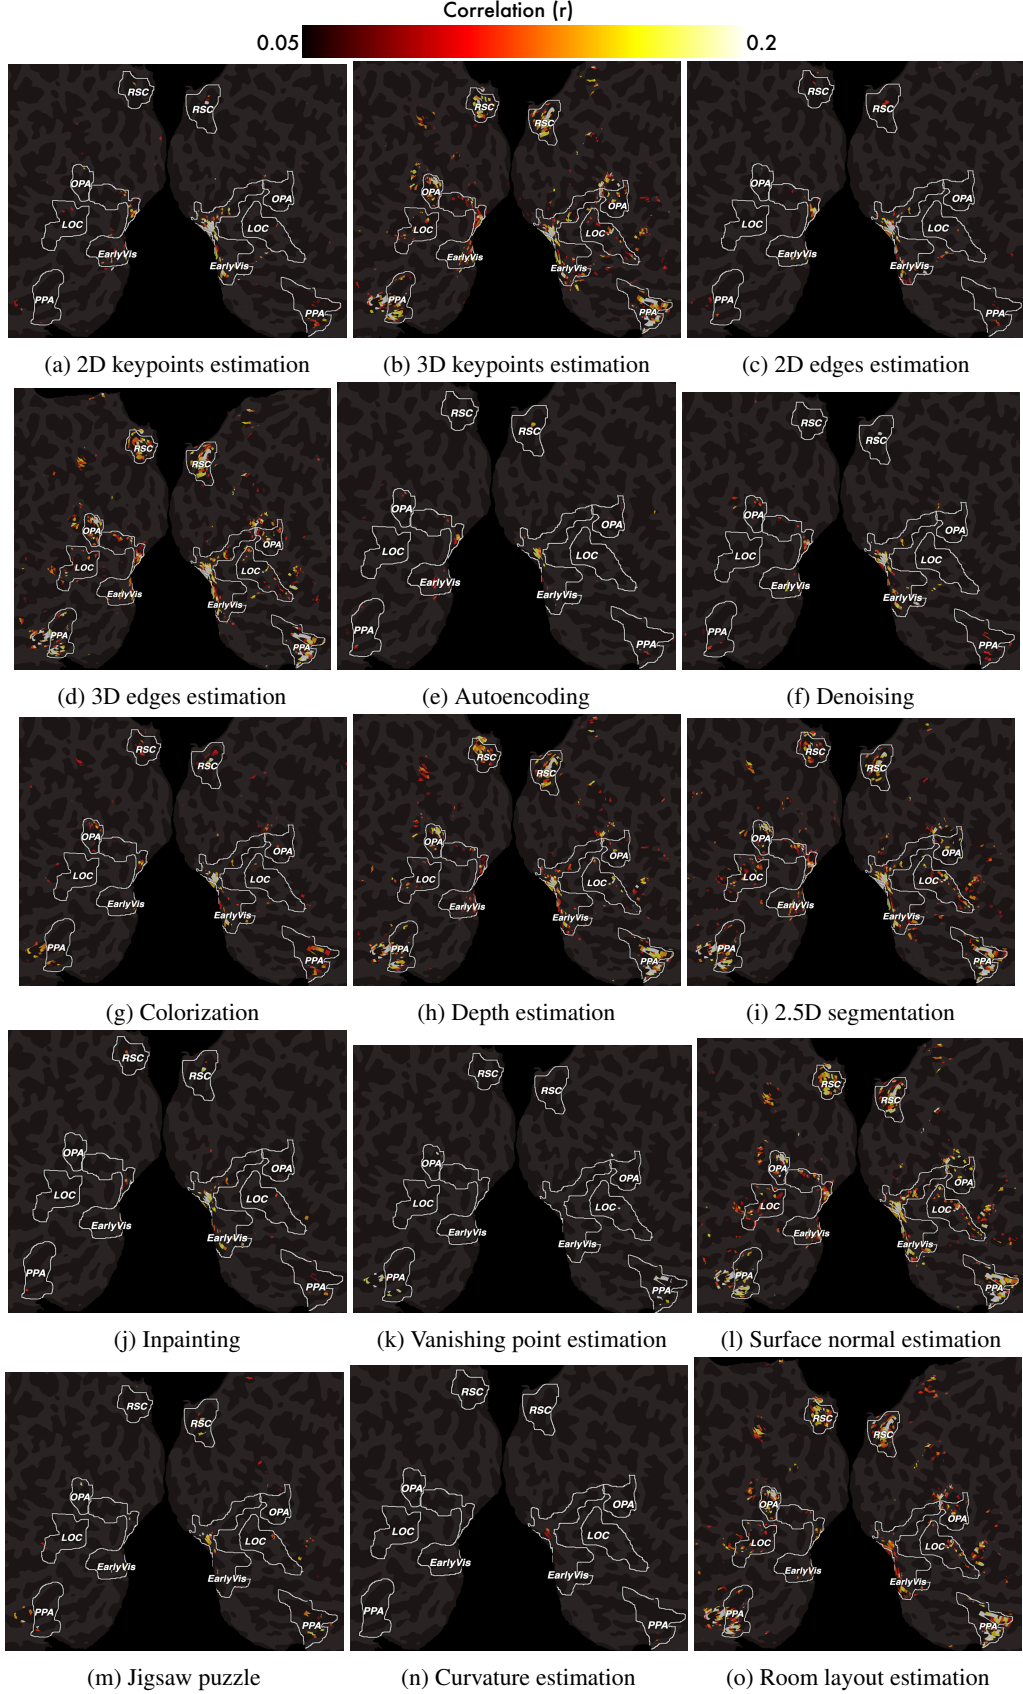

Figure 2: Model predictions of tasks from Taskonomy. Voxels below significance threshold ( $p \geq 0.05$ , FDR corrected) are masked.

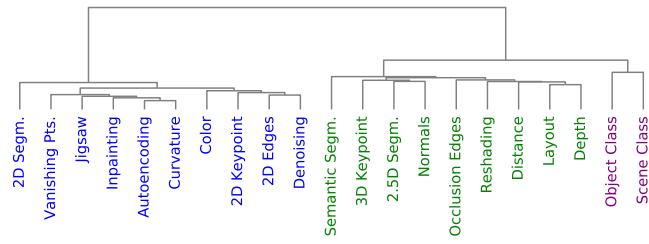

(a) Neural Taskonomy (Subject 1)

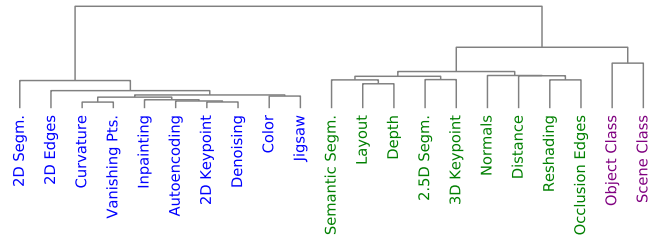

(b) Neural Taskonomy (Subject 2)

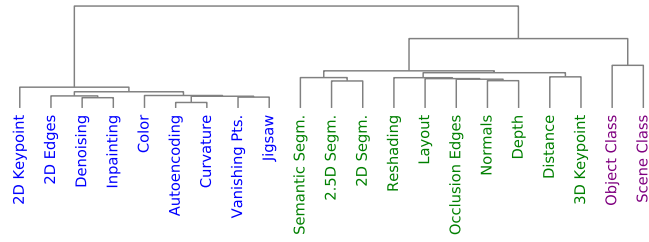

(c) Neural Taskonomy (Subject 3)
